# Supplementary material
Source: PubMed Central journal article supplement (PMC4938737)
Supplement: NIHMS788925-supplement.pdf [file NIHMS788925-supplement.pdf]

## Supplemental Information

### Structural Mechanism of Transcriptional Regulator NSD3 Recognition by the ET Domain of BRD4

Qiang Zhang, Lei Zeng, Chen Shen, Ying Ju, Tsuyoshi Konuma, Chengcheng Zhao, Christopher R. Vakoc, & Ming-Ming Zhou

#### Supplemental Figures:

**Figure S1.** NMR structural analysis of the BRD4 ET domain-LANA complex. Related to Figure 1.

**Figure S2.** Mutational analysis of the BRD4 ET domain binding to the LANA peptide by NMR. Related to Figure 1.

**Figure S3.** Assessing effects of LANA mutations on binding to the Brd4 ET domain by NMR. Related to Figure 1.

**Figure S4.** Characterization of the BRD4 ET domain binding motif in proteins in gene transcription. Related to Figure 2.

**Figure S5.** NMR structural analysis of the BRD4 ET domain binding to NSD3. Related to Figure 2.

**Figure S6.** NMR structural analysis of BRD4 ET domain binding to different sites in NSD3. Related to Figure 2.

**Table S1.** Putative ET domain binding sites in proteins involved in gene transcription. Related to Figure 2.

**Table S2.** Primers used in this study. Related to Figures 2 and 3.

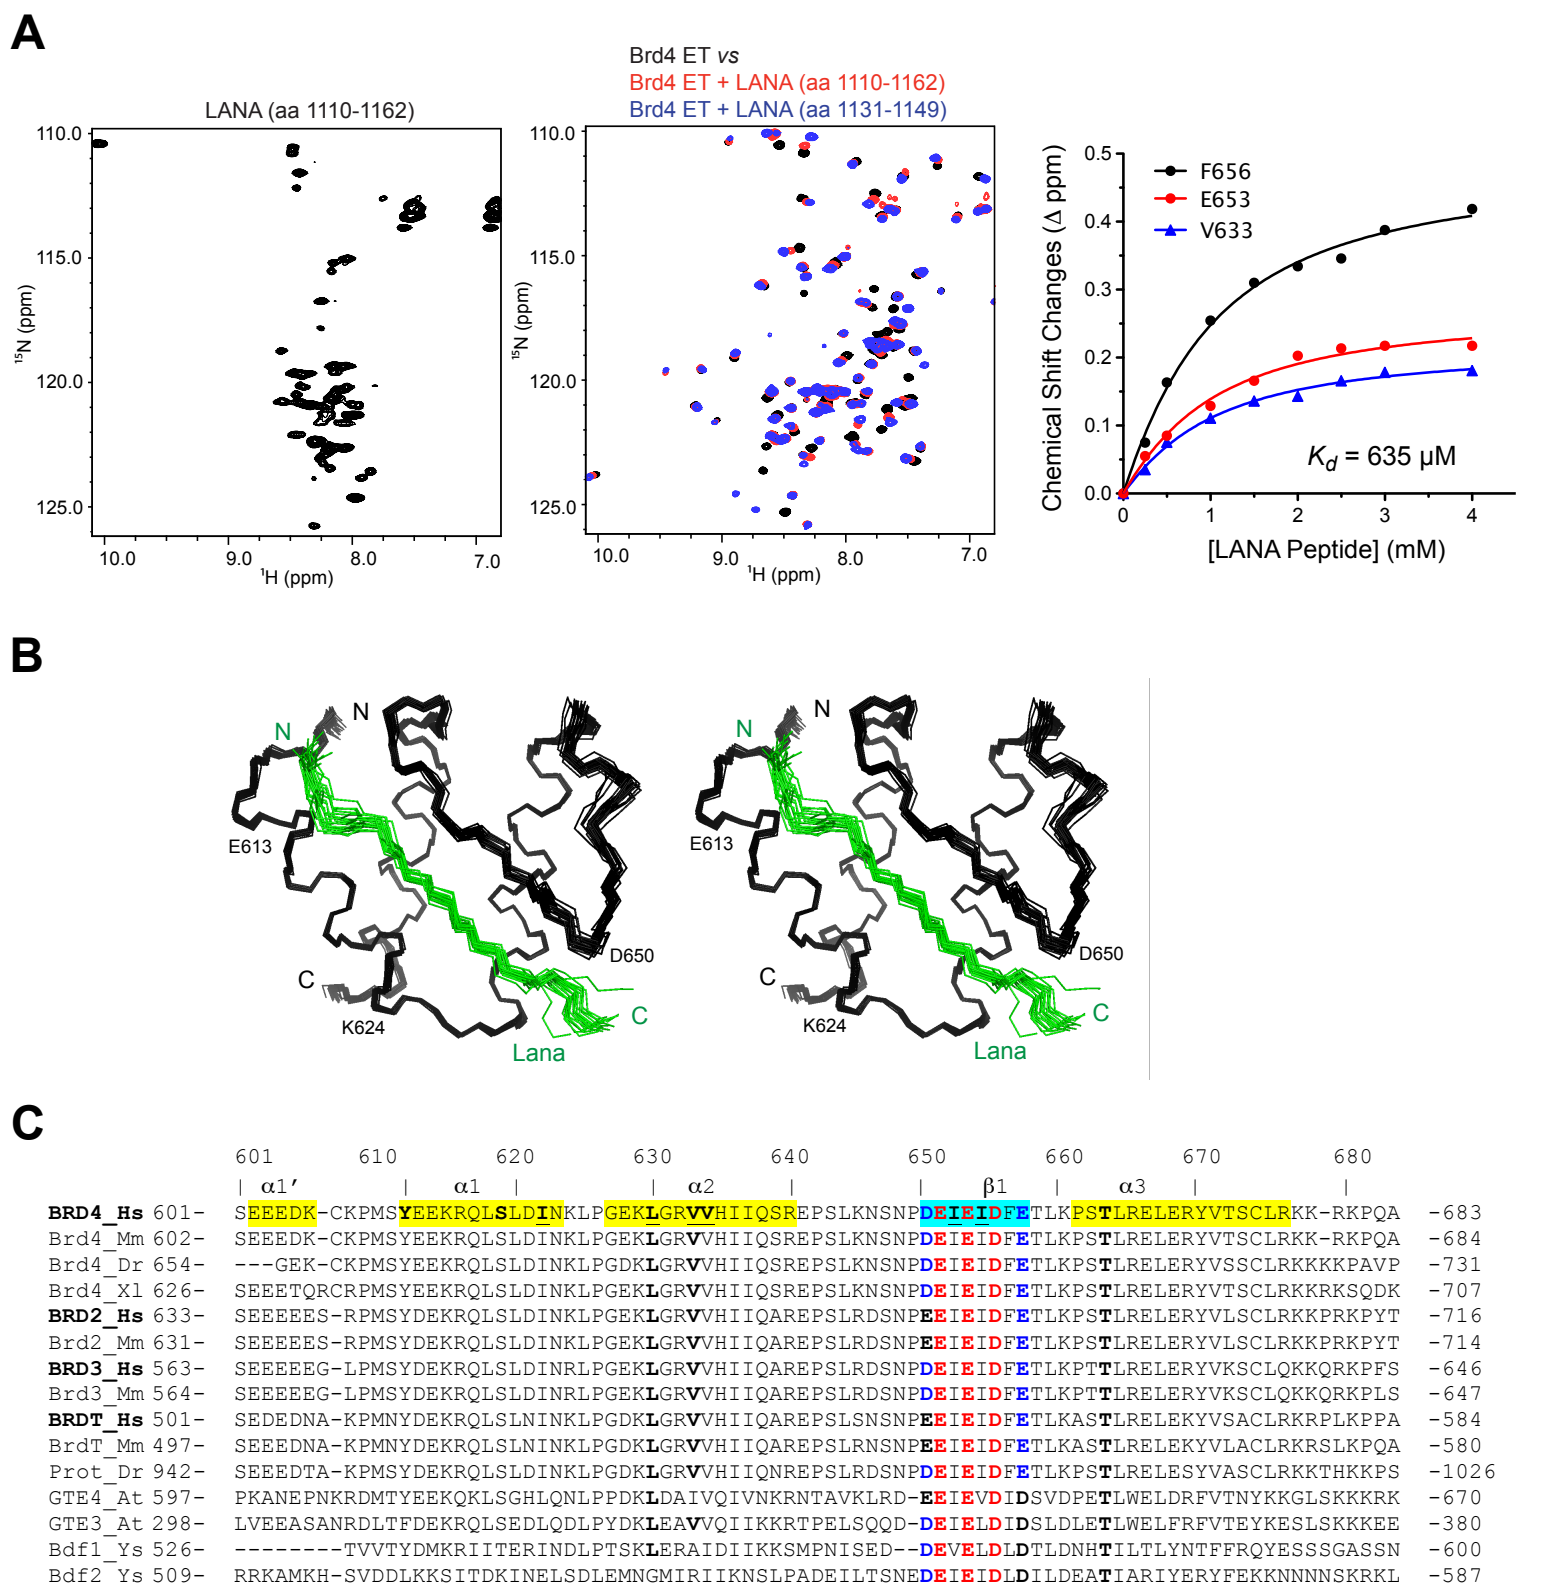

**Figure S1. NMR structural analysis of the BRD4 ET domain-LANA complex. Related to Figure 1.**

**(A)** Identification of the ET domain binding site in the C-terminal region of LANA. Left, 2D  $^1\text{H}$ - $^{15}\text{N}$  HSQC spectrum of LANA C-terminal segment (residues 1110-1162). Middle, 2D  $^1\text{H}$ - $^{15}\text{N}$  HSQC spectra of the BRD4 ET domain in the free state (black) or in the presence of peptides derived from the C-terminal region of LANA (blue and red), as indicated. Right, determination of binding affinity of the LANA peptide (residues 1133-1144) to the BRD4 ET domain by NMR titration using 2D  $^1\text{H}$ - $^{15}\text{N}$  HSQC spectroscopy.

**(B)** The structure of the BRD4 ET domain in complex with a LANA peptide (QSSIVKFKKPLP, residues 1133-1144) is shown as stereoview of the backbone atoms (N, C $\alpha$  and C') of 25 superimposed NMR structures of the complexes (left).

**(C)** Structure-based sequence alignment of the ET domains from BRD4 proteins of human, mouse, fly, zebrafish and yeast. The conserved residues at the peptide binding site are indicated in bold, and highlighted in red for the absolutely conserved and blue for highly conserved. The key residues that are located in the peptide binding site are shown in bold and underlined.

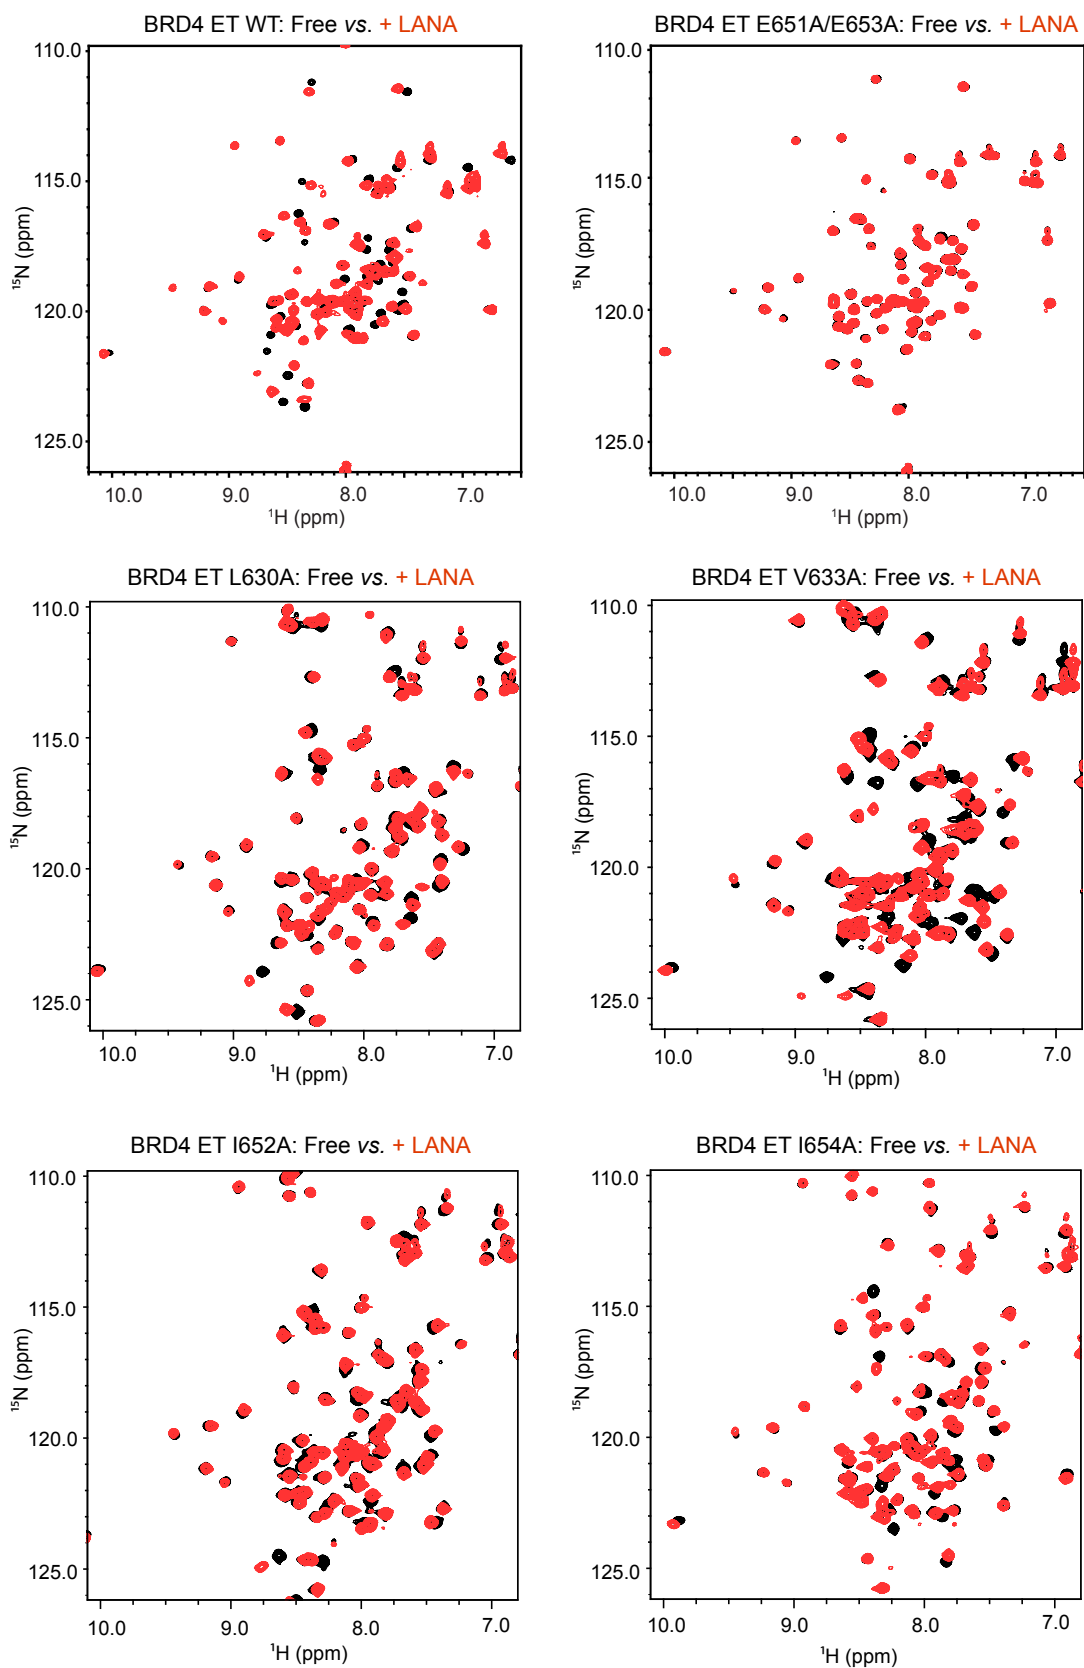

**Figure S2. Mutational analysis of the BRD4 ET domain binding to the LANA peptide by NMR. Related to Figure 1.** Superposition of 2D  $^1\text{H}$ - $^{15}\text{N}$  HSQC spectra of the Brd4 ET wild-type, or mutants (L630A, V633A, I652A, I654A, and E651A/E653A) in the free form (black) versus in the presence of the LANA peptide (red, residues 1033-1044), respectively. The protein concentration was 0.1 mM and the molar ratio of the protein to peptide was kept at 1:5.

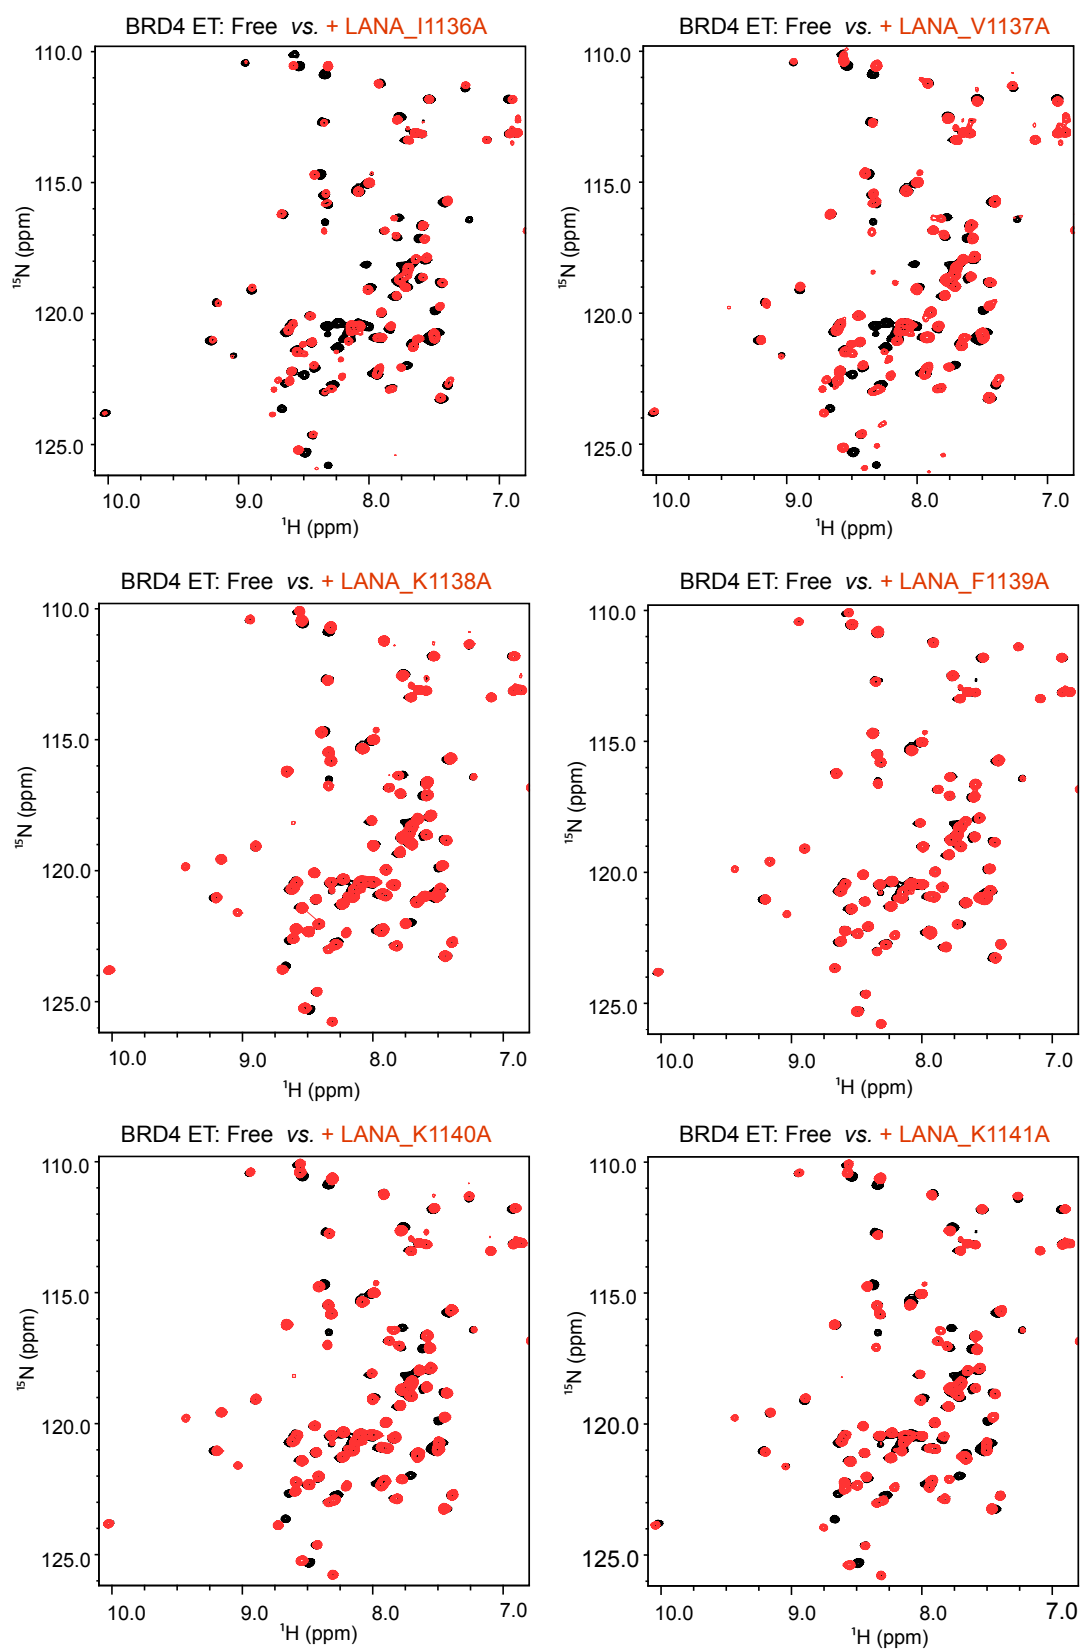

**Figure S3. Assessing effects of LANA mutations on binding to the Brd4 ET domain by NMR. Related to Figure 1.** Superposition of 2D  $^1\text{H}$ - $^{15}\text{N}$  HSQC spectra of the BRD4 ET domain in the free form (black) versus in the presence of mutant LANA peptide (red): LANA-I1136A; LANA-1137A; LANA-K1138A; LANA-F1139A; LANA-K1140A; LANA-K1141A. The protein concentration was 0.1 mM and the molar ratio of the protein to peptide was kept at 1:5.

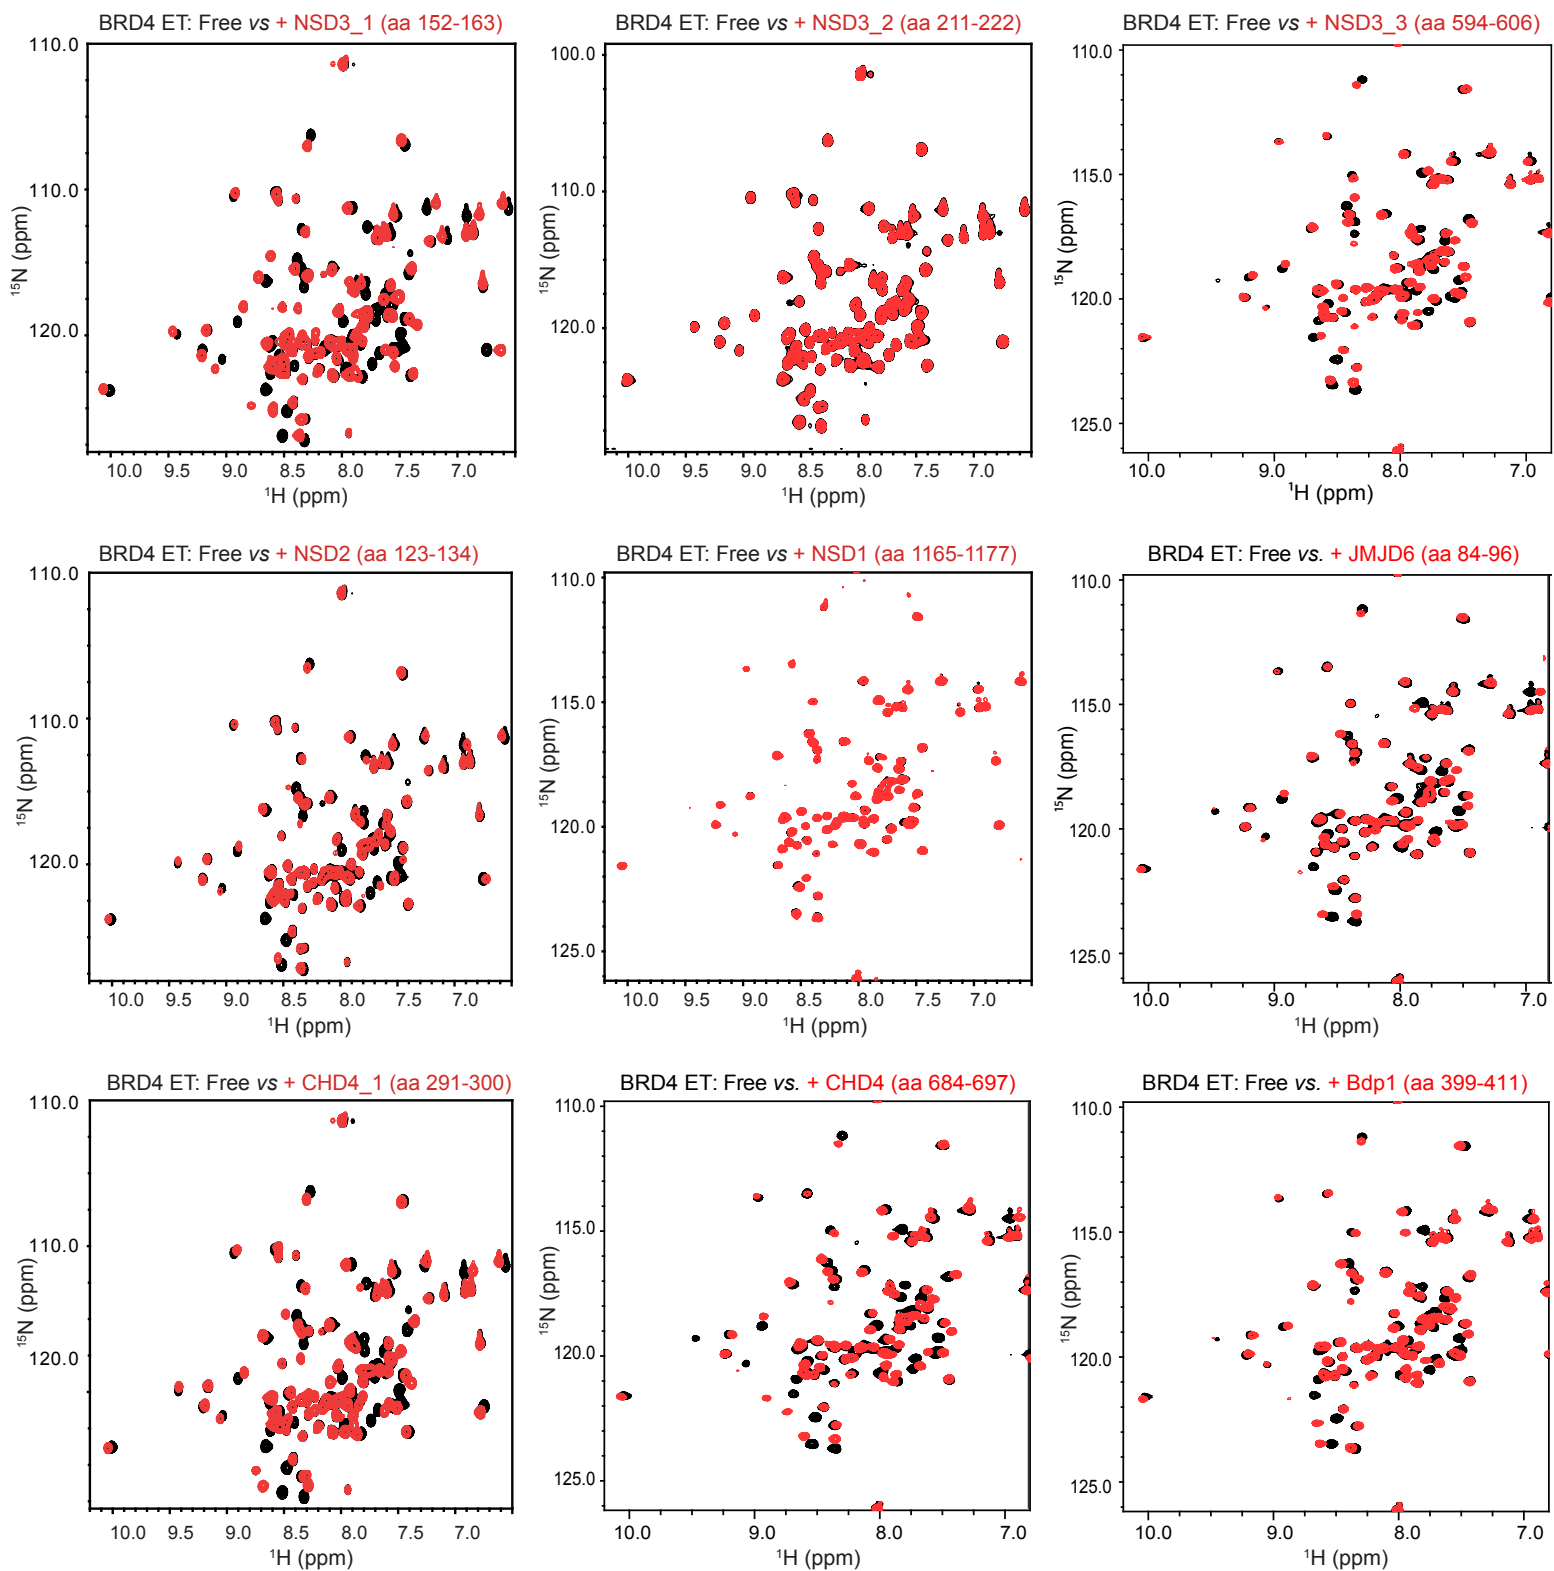

**Figure S4. Characterization of the BRD4 ET domain binding motif in proteins in gene transcription. Related to Figure 2.** Superposition of 2D  $^1\text{H}$ - $^{15}\text{N}$  HSQC spectra of the BRD4 ET domain in the free form (black) versus in the presence of a peptide derived various proteins as indicated (red). The protein concentration was 0.1 mM and the molar ratio of the protein to peptide was kept at 1:5.

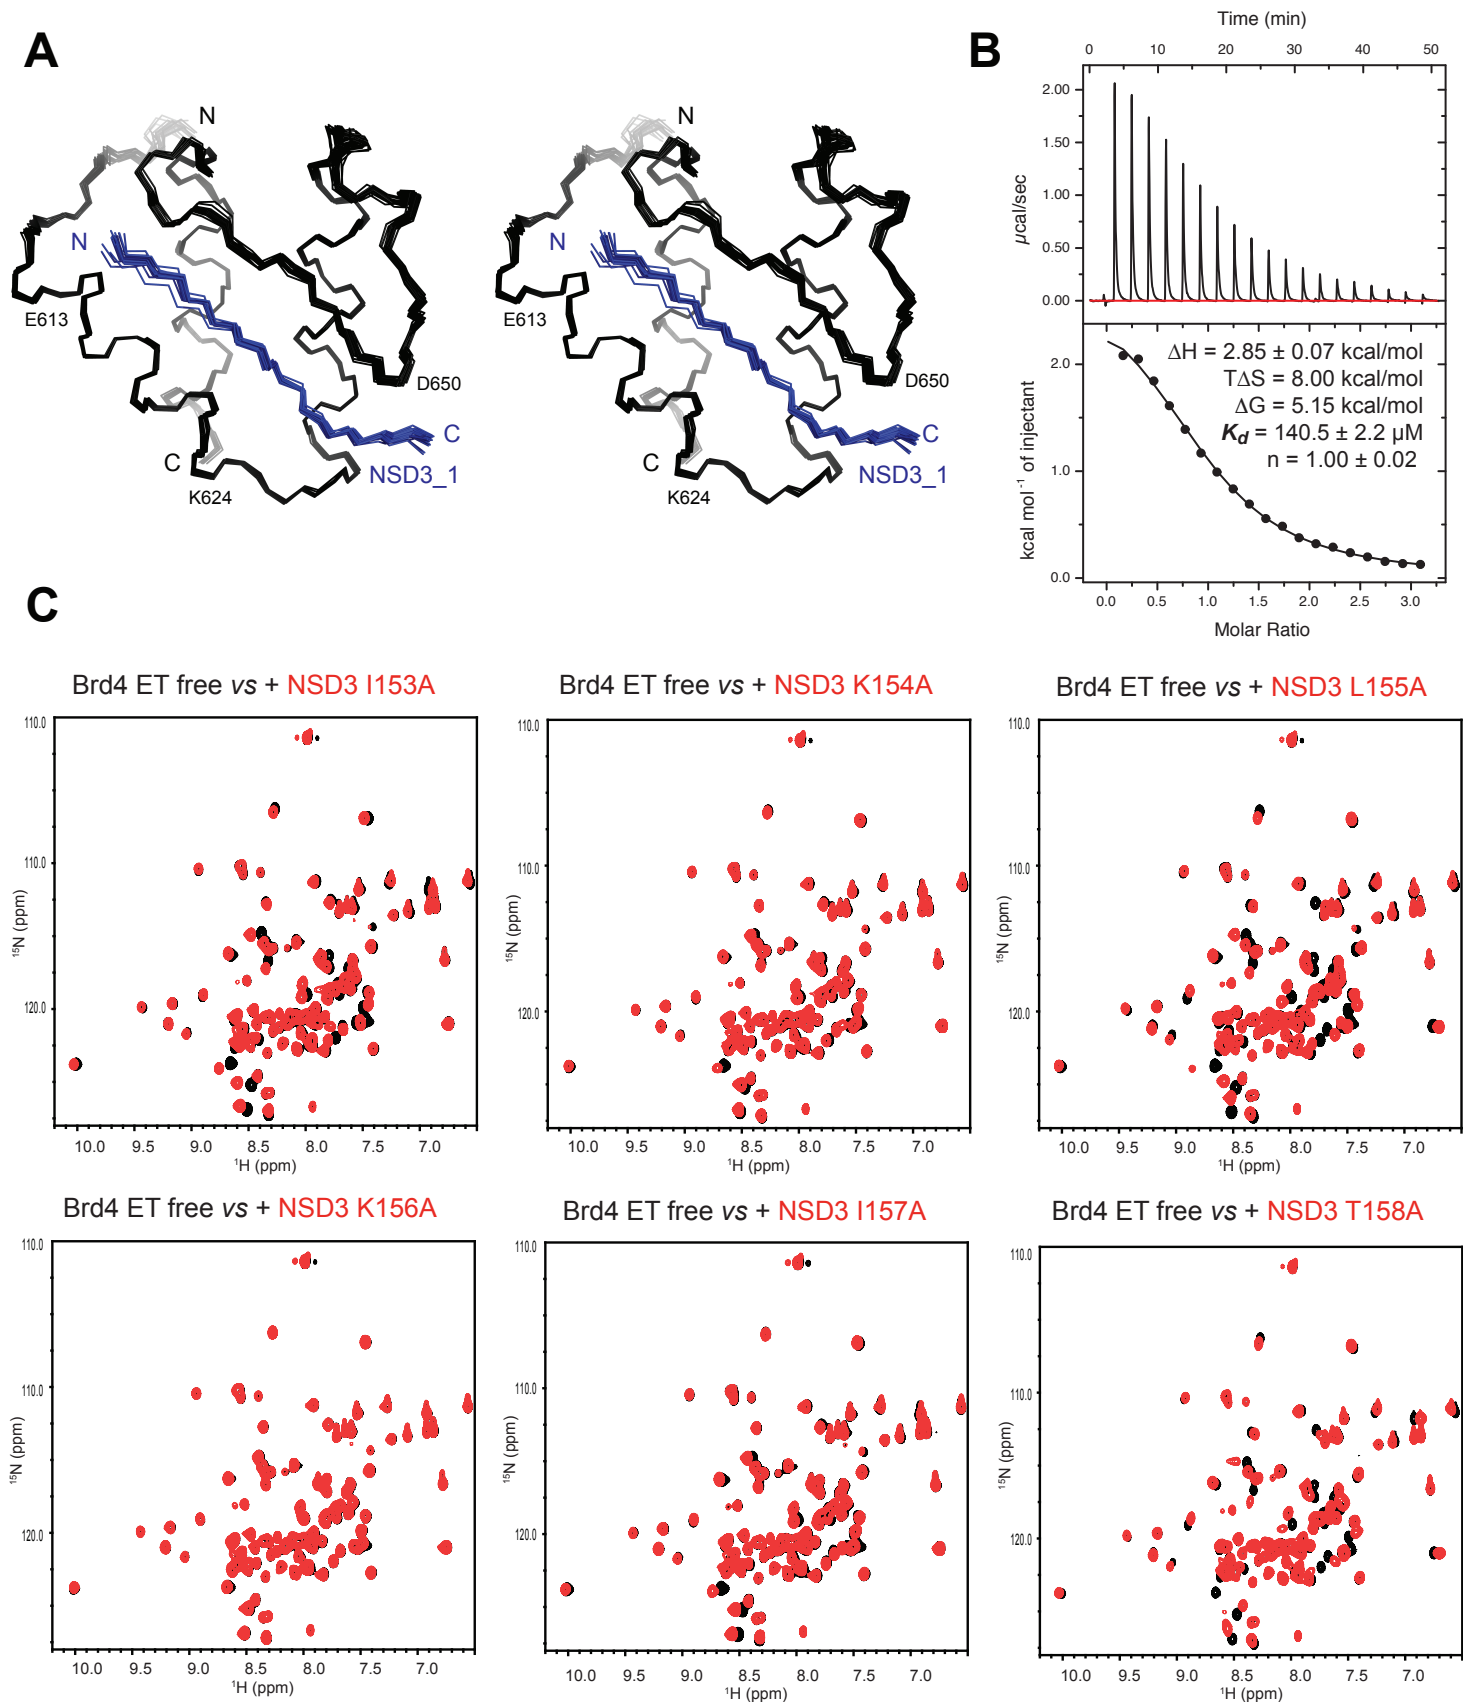

**Figure S5. NMR structural analysis of the BRD4 ET domain binding to NSD3. Related to Figure 2.**

**(A)** The structure of the BRD4 ET domain in complex with a NSD3-1 peptide (EIKLKITKTIQN, residues 152-163) is shown as stereoview of the backbone atoms (N, C $\alpha$  and C') of 25 superimposed NMR structures of the complex (left).

**(B)** ITC determination of binding affinity of NSD3-1 peptide (SPEIKLKITKT, residues 150-160) to the ET domain of BRD4.

**(C)** Superposition of 2D  $^1\text{H}$ - $^{15}\text{N}$  HSQC spectra of the BRD4 ET domain in the free form (black) versus in the presence of various NSD3 peptides carrying point Ala mutation as indicated (red). The protein concentration was 0.2 mM and the molar ratio of the protein to peptide was kept at 1:5. The NMR sample sodium phosphate buffer used consists of 50 mM  $\text{Na}_2\text{HPO}_4$ - $\text{NaH}_2\text{PO}_4$  at pH6.5, containing 2.0 mM EDTA and 2.0 mM DTT.

**A**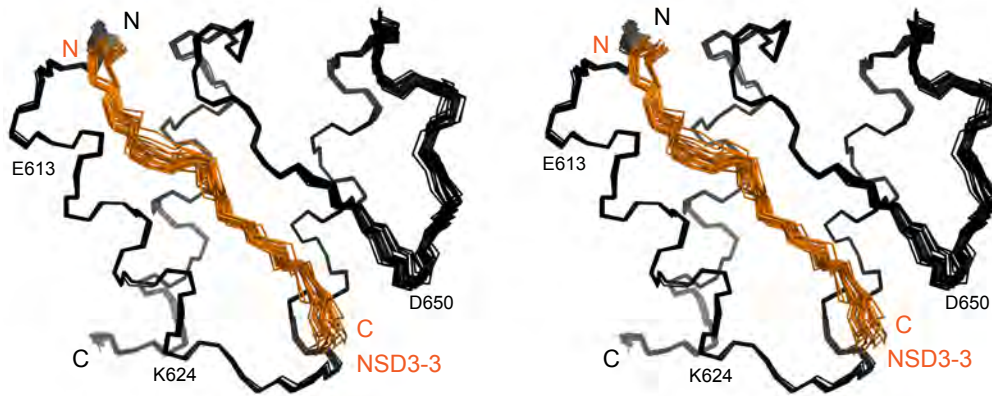**B**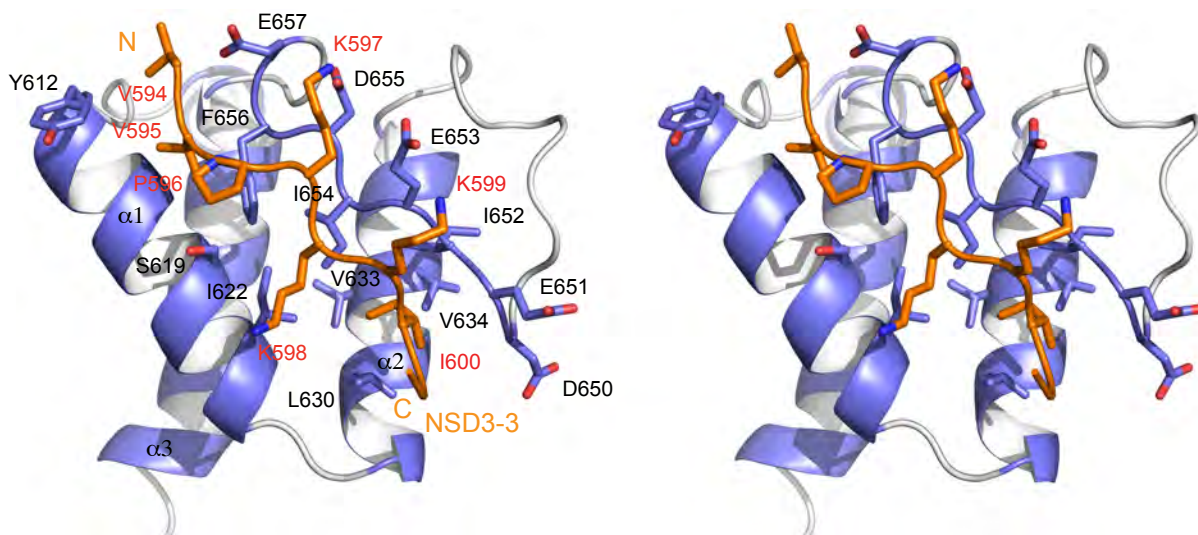

**Figure S6. NMR structural analysis of BRD4 ET domain binding to different sites in NSD3. Related to Figure 2.**  
**(A)** The structure of the BRD4 ET domain in complex with a NSD3-3 peptide (VVPKKIKKEQVE) is shown as stereoview of the backbone atoms (N, C $\alpha$  and C') of 25 superimposed NMR structures of the complex.  
**(B)** Ribbons representation of the average minimized NMR structure of the BRD4 ET domain/NSD3-3 peptide complex in a similar orientation, prepared using Pymol (middle).

**Table S1. Putative ET domain binding sites in proteins involved in gene transcription. Related to Figure 2.**

The identification of putative ET domain binding motifs in cellular proteins was done using Scan Prosite program (<http://prosite.expasy.org>), as described in detail in Experimental Procedures. Note that RBBP4 is identified as one of Brd4 ET domain associated proteins reported by Rahman and colleagues (2011).

| UniProKB_ID | Protein name                                                  | Putative ET domain binding sites | Residue numbers |
|-------------|---------------------------------------------------------------|----------------------------------|-----------------|
| P51532      | Transcription activator BRG1                                  | SRS <b>VVKVI</b> KLG             | 1590-1600       |
|             |                                                               | SVK <b>VKIKL</b> GRK             | 1592-1602       |
| Q9NR48      | Histone-lysine N-methyltransferase ASH1L                      | EGN <b>LKLKI</b> GLQ             | 82-92           |
| Q12873      | Chromodomain-helicase-DNA-binding protein 3                   | MAP <b>LKIKL</b> GLL             | 289-299         |
| Q03164      | Histone-lysine N-methyltransferase 2A                         | FPG <b>VKIKI</b> THG             | 228-238         |
| Q8NEZ4      | Histone-lysine N-methyltransferase 2C                         | KPK <b>LKLKI</b> INQ             | 1200-1211       |
| Q8WVC0      | RNA polymerase-associated protein LEO1                        | RTR <b>LKLK</b> VENT             | 409-419         |
| Q5JPI9      | Protein-lysine N-methyltransferase METTL10                    | LSN <b>IKLKV</b> EDF             | 127-137         |
| Q6ZTZ1      | Myb/SANT-like DNA-binding domain-containing protein 1         | GEE <b>IKIKI</b> TNM             | 92-102          |
| P35579      | Myosin-9                                                      | NKE <b>LKVKL</b> QEM             | 1787-1797       |
| Q00872      | Myosin-binding protein C                                      | HAS <b>IKVKV</b> VDF             | 609-619         |
| Q9H3P2      | Negative elongation factor A                                  | GGA <b>VKLKL</b> LLG             | 49-59           |
| Q96D46      | 60S ribosomal export protein NMD3                             | SKR <b>LKVKL</b> TIQ             | 107-117         |
| Q9ULI1      | NACHT and WD repeat domain-containing protein 2               | DAAL <b>LKIKI</b> IATS           | 1650-1660       |
| Q86SE9      | Polycomb group RING finger protein 5                          | FLS <b>LKLKL</b> PSS             | 179-189         |
| Q9NUG6      | p53 and DNA damage-regulated protein 1                        | RKQ <b>LKVKV</b> NRL             | 92-102          |
| Q92576      | PHD finger protein 3                                          | NKE <b>IKVKV</b> DNI             | 1520-1530       |
| Q09028      | Histone-binding protein RBBP4*                                | LRN <b>LKLKL</b> HSF             | 303-313         |
| Q16576      | Histone-binding protein RBBP7                                 | LRN <b>LKLKL</b> HTF             | 302-312         |
| Q9Y580      | RNA-binding protein 7                                         | GPV <b>IKVKI</b> PKD             | 34-44           |
| Q2KHR2      | DNA-binding protein RFX7                                      | SPD <b>IKVKE</b> GS              | 657-667         |
| Q9H1D9      | DNA-directed RNA polymerase III subunit RPC6                  | MAE <b>VKVKV</b> QPP             | 1-11            |
| Q9H9Y6      | DNA-directed RNA polymerase I subunit RPA2                    | AMN <b>IKVKL</b> DVV             | 1125-1135       |
| Q86TU7      | Histone-lysine N-methyltransferase setd3                      | HDR <b>VKIKL</b> GVS             | 334-344         |
| Q9C086      | INO80 complex subunit B.                                      | KPQ <b>LKLKI</b> KLG             | 66-76           |
|             |                                                               | QLK <b>LKIKL</b> GGQ             | 68-78           |
| O60583      | Cyclin-T2                                                     | TSP <b>IKMKI</b> PIA             | 478-488         |
|             |                                                               | KEE <b>LKMKI</b> KVS             | 520-530         |
|             |                                                               | ELK <b>MKIKV</b> SSS             | 522-532         |
| Q9BZH6      | WD repeat-containing protein 11.                              | ADV <b>VKVK</b> WARE             | 62-72           |
| O75083      | WD repeat-containing protein 1.                               | GPP <b>FKFKF</b> TIG             | 177-187         |
| Q9P2L0      | WD repeat-containing protein 35                               | NFM <b>IKMKL</b> SCL             | 188-198         |
| Q6NYC1      | Bifunctional arginine demethylase and lysyl-hydroxylase JMJD6 | GYS <b>VKMKM</b> KYY             | 107-117         |
| Q96N64      | PWWP domain-containing protein 2A                             | SNS <b>LKMKV</b> FSK             | 630-640         |
| Q96EB1      | Elongator complex protein 4                                   | ESN <b>IKMKI</b> AWR             | 153-163         |
| Q8TD26      | Chromodomain-helicase-DNA-binding protein 6                   | <b>MKMKI</b> QKK                 | 1-8             |
| O14867      | Transcription regulator protein BACH1                         | FQF <b>LKFKF</b> LDS             | 123-133         |
| Q9P281      | BAH and coiled-coil domain-containing protein 1               | NMV <b>VKVKV</b> FYH             | 2516-2526       |
| P56524      | Histone deacetylase 4                                         | STE <b>VKMKL</b> QEF             | 168-178         |
| Q9UGU5      | HMG domain-containing protein 4                               | PDG <b>LKMKL</b> ILS             | 187-197         |
| Q9UIG0      | Tyrosine-protein kinase BAZ1B                                 | EKM <b>LKVKI</b> VKI             | 137-147         |
| Q9NYF8      | Bcl-2-associated transcription factor 1                       | RPE <b>VKLKM</b> APV             | 544-554         |
| P49336      | Cyclin-dependent kinase 8                                     | DYD <b>FKVKL</b> SSE             | 2-12            |



**Table S2. Primers used in this study. Related to Figures 2 and 3**

The names of genes that the primers were designed to target are as shown. F and R stand for forward and reverse primers, respectively.

| <b>Gene</b>          | <b>Primer sequence</b> |
|----------------------|------------------------|
| m <i>Gapdh</i> RT_F  | TTCACCACCATGGAGAAGGC   |
| m <i>Gapdh</i> RT_R  | CCCTTTTGGCTCCACCCT     |
| m <i>Nsd3</i> RT_F   | TCCTTACCAGCCTCCATCAC   |
| m <i>Nsd3</i> RT_R   | CCCATCTCCTGTTGCATTCT   |
| m <i>Myc</i> RT_F    | GCCGATCAGCTGGAGATGA    |
| m <i>Myc</i> RT_R    | GTCGTCAGGATCGCAGATGAAG |
| m <i>Myb</i> RT_F    | GCTGAAGAAGCTGGTGG AAC  |
| m <i>Myb</i> RT_R    | CAACGCTTCGGACCATATTT   |
| m <i>Check1</i> RT_F | ATTCTATGGCCACAGGAGGG   |
| m <i>Check1</i> RT_R | ATAAACCACCCCTGCCATGA   |
| m <i>Chst13</i> RT_F | CAGTGTTCGTTGAAGGGCTC   |
| m <i>Chst13</i> RT_R | TTGTGTGCCCAAGAAGATGC   |
| m <i>Elane</i> RT_F  | TGGCCTCAGAGATTGTTGGT   |
| m <i>Elane</i> RT_R  | TACCTGCACTGACCGGAAAT   |
| m <i>Hmgb2</i> RT_F  | GAACACCCAGGCCTGTCTAT   |
| m <i>Hmgb2</i> RT_R  | TTCCTGCTTCACTTTTGCCC   |
